# Supplementary material for: A Hybrid Computational Framework for Intelligent Inter-continent SARS-CoV-2 Sub-strains Characterization and Prediction
Source: Research Square preprint supplement (doi:10.21203/rs.3.rs-88429/v2), 2020-11-06
Supplement: Supplementary file 1 [file b51ca3233ab9e811792de22c.xlsx]

## Sheet: Cognitive map_male_female
A Hybrid Computational Framework for Intelligent Inter-continent SARS-CoV-2 Sub-strains Characterization and Prediction
Moses Ekpenyong1*, Mercy Edoho1, Udoinyang Inyang1, Faith-Michael Uzoka2, Itemobong Ekaidem3, Anietie Moses3, Martins Emeje4, Youtchou Tatfeng5, Ifiok Udo1, Enoabasi Anwana6, Oboso Etim7, Geoffrey Joseph1, Emmanuel Dan1.
1Department of Computer Science, University of Uyo, Nigeria
2Department of Mathematics and Computing, Mount Royal University, Canada
3College of Health Sciences, University of Uyo, Nigeria
4National Institute for Pharmaceutical Research and Development (NIPRD), Abuja
5College of Health Sciences, Niger Delta University, Nigeria
6Department of Botany and Ecological Studies, University of Uyo, Nigeria
7Department of Biochemistry, University of Uyo, Nigeria
SupplData4.xlsx: Cognitive maps for male and female patients.
CogMap for Male Isolates
isolate1	isolate2	isolate3	isolate4	isolate5	isolate6	isolate7	isolate8	isolate9
(2), 18, 33, (52,53), 60, (62, 63), 66	(1), 18, 33, (52,53), 60, (62,63), 66	19, 30	10, (11, 12), 14, 16, 20, 21, 34, 37, 48, 61, 64, 67, 72, 75	(6), 15, 26, 28, 59, 65, 76	(5), 15, 26, 28, 59, 65, 76	(8), 9, 13, 23, 29, 31, (42,43), (50,51), 74, 79	(7), 9, 13, 23, 29, 31, (42,43), (50,51), 74, 79	(7,8), 13, 23, 29, 31, (42,43), (50,51), 74, 79
isolate10	isolate11	isolate12	isolate13	isolate14	isolate15	isolate16	isolate17	isolate18
4, (11,12), 14, 16, 20, 21, 34, 37, 48, 61, 64, 67, 72, 75	4, 10, 12, 14, 16, 20, 21, 34, 37, 48, 61, 64, 67, 72, 75	4, 10, 11, 14, 16, 20, 21, 34, 37, 48, 61, 64, 67, 72, 75	(7,8), 9, 23, 29, 31, (42,43), (50,51), 74, 79	4, 10, (11,12), 16, 20, 21, 34, 37, 48, 61, 64, 67, 72, 75	(5,6), 26, 28, 59, 65, 76	4, 10, (11,12), 20, 21, 34, 37, 48, 61, 64, 67, 72, 75	(24,25), 40, 45, (46,47), (54,55), (56,57), 58, (68,69), (70,71), 73, (77,78)	(1,2), 33, (52,53), 60, (62,63), 66
isolate19	isolate20	isolate21	isolate22	isolate23	isolate24	isolate25	isolate26	isolate27
3, 30	4, 10, (11,12), 14, 16, 21, 34, 37, 48, 61, 64, 67, 72, 75	4, 10, (11,12), 14, 16, 20, 34, 37, 48, 61, 64, 67, 72, 75	36, 49	(7,8), 9, 13, 29, 31, (42,43), (50,51), 74, 79	17, 25, 40, 45, (46,47), (54,55), (56,57), 58, (68,69), (70,71), 73, (77,78)	17, 24, 40, 45, (46,47), (54,55), (56,57), 58, (68,69), (70,71), 73, (77,78)	(5,6), 15, 28, 59, 65, 76	32, 35, 39, 44
isolate28	isolate29	isolate30	isolate31	isolate32	isolate33	isolate34	isolate35	isolate36
(5,6), 15, 26, 59, 65, 76	(7,8), 9, 13, 23, 31, (42,43), (50,51), 74, 79	3, 19	(7,8), 9, 13, 23, 29, (42,43), (50,51), 74, 79	27, 35, 39, 44	(1,2), 18, (52,53), 60, (62,63), 66	4, 10, (11,12), 14, 16, 20, 21, 37, 48, 61, 64, 67, 72, 75	27, 32, 39, 44	22, 49
isolate37	isolate38	isolate39	isolate40	isolate41	isolate42	isolate43	isolate44	isolate45
4, 10, (11,12), 14, 16, 20, 21, 34, 48, 61, 64, 67, 72, 75	41, 66	27, 32, 35	17, (24,25), 45, (46,47), (54,55), (56,57), 58, (68,69), (70,71), 73, (77,78)	38, 66	(7,8), 9, 13, 23, 29, 31, (43), (50,51), 74, 79	(7,8), 9, 13, 23, 29, 31, (42), (50,51), 74, 79	27, 32, 35, 39	17, (24,25), 40, (46,47), (54,55), (56,57), 58, (68,69), (70,71), 73, (77,78)
isolate46	isolate47	isolate48	isolate49	isolate50	isolate51	isolate52	isolate53	isolate54
17, (24,25), 40, 45, 47, (54,55), (56,57), 58, (68,69), (70,71), 73, (77,78)	17, (24,25), 40, 45, 46, (54,55), (56,57), 58, (68,69), (70,71), 73, (77,78)	4, 10, (11,12), 14, 16, 20, 21, 34, 37, 61, 64, 67, 72, 75	22, 36, 49	(7,8), 9, 13, 23, 29, 31, (42,43), 51, 74, 79	(7,8), 9, 13, 23, 29, 31, (42,43), 50, 74, 79	(1,2), 18, 33, 53, 60, (62,63), 66	(1,2), 18, 33, 52, 60, (62,63), 66	17, (24,25), 40, 45, 46, (54,55), (56,57), 58, (68,69), (70,71), 73, (77,78)
isolate55	isolate56	isolate57	isolate58	isolate59	isolate60	isolate61	isolate62	isolate63
17, (24,25), 40, 45, (46,47), 54, (56,57), 58, (68,69), (70,71), 73, (77,78)	17, (24,25), 40, 45, (46,47), (54,55), 57, 58, (68,69), (70,71), 73, (77,78)	17, (24,25), 40, 45, (46,47), (54,55), 56, 58, (68,69), (70,71), 73, (77,78)	17, (24,25), 40, 45, (46,47), (54,55), (56,57), (68,69), (70,71), 73, (77,78)	(5,6), 15, 26, 28, 65, 76	(1,2), 18, 33, (52,53), (62,63), 66	4, 10, (11,12), 14, 16, 20, 21, 34, 37, 48, 67, 72, 75	(1,2), 18, 33, (52,53), 60, (63), 66	(1,2), 18, 33, (52,53), 60, (62), 66
isolate64	isolate65	isolate66	isolate67	isolate68	isolate69	isolate70	isolate71	isolate72
4, 10, (11,12), 14, 16, 20, 21, 34, 37, 48, 61, 67, 72, 75	(5,6), 15, 26, 28, 59, 76	(1,2), 18, 33, (52,53), 60, (62, 63)	4, 10, (11,12), 14, 16, 20, 21, 34, 37, 48, 61, 64, 72, 75	17, (24,25), 40, 45, (46,47), (54,55), (56,57), 58, 69, (70,71), 73, (77,78)	17, (24,25), 40, 45, (46,47), (54,55), (56,57), 58, 68, (70,71), 73, (77,78)	17, (24,25), 40, 45, (46,47), (54,55), (56,57), 58, (68,69), 71, 73, (77,78)	17, (24,25), 40, 45, (46,47), (54,55), (56,57), 58, (68,69), 70, 73, (77,78)	4, 10, (11,12), 14, 16, 20, 21, 34, 37, 48, 61, 64, 67, 75
isolate73	isolate74	isolate75	isolate76	isolate77	isolate78	isolate79
17, (24,25), 40, 45, (46,47), (54,55), (56,57), 58, (68,69), (70,71), (77,78)	(7,8), 9, 13, 23, 29, 31, (42,43), (50,51), 79	4, 10, (11,12), 14, 16, 20, 21, 34, 37, 48, 61, 64, 67, 72	(5,6), 15, 26, 28, 59, 65	17, (24,25), 40, 45, (46,47), (54,55), (56,57), 58, (68,69), (70,71), 73, 78	17, (24,25), 40, 45, (46,47), (54,55), (56,57), 58, (68,69), (70,71), 73, 77	(7,8), 9, 13, 23, 29, 31, (42,43), (50,51), 74
Clusters Summary
Cluster 1	(1,2), 18, 33, (52,53), 60, (62, 63), 66
Cluster 2	3, 19, 30
Cluster 3	4, 10, (11, 12), 14, 16, 20, 21, 34, 37, 48, 61, 64, 67, 72, 75
cluster 5	(7,8), 9, 13, 23, 29, 31, (42,43), (50,51), 74, 79
Cluster 4	(5,6), 15, 26, 28, 59, 65, 76
cluster 6	17, (24,25), 40, 45, (46,47), (54,55), (56,57), 58, (68,69), (70,71), 73, (77,78)
cluster 7	22, 36, 49
cluster 8	27, 32, 35, 39, 44
cluster 9	38, 41, 66
CogMap for Female Isolates
isolate1	isolate2	isolate3	isolate4	isolate5	isolate6	isolate7	isolate8	isolate9
3, 5, 9, 10, 21, 27, 31, 36, 38, 39, 47, 51, 54, 59, (61,62), 63, 70, 72, 75	(18,19), 29, 35	1, 5, 9, 10, 21, 27, 31, 36, 38, 39, 47, 51, 54, 59, (61,62), 63, 70, 72, 75	(14,15), 16, 20, 65, (73,74), (77,78)	1, 3, 9, 10, 21, 27, 31, 36, 38, 39, 47, 51, 54, 59, (61,62), 63, 70, 72, 75	(7), 8, 11, 22, 30, (41,42), 44, 66	(6), 8, 11, 22, 30, (41,42), 44, 66	(6,7), 11, 22, 30, (41,42), 44, 66	1, 3, 5, 10, 21, 27, 31, 36, 38, 39, 47, 51, 54, 59, (61,62), 63, 70, 72, 75
isolate10	isolate11	isolate12	isolate13	isolate14	isolate15	isolate16	isolate17	isolate18
1, 3, 5, 9, 21, 27, 31, 36, 38, 39, 47, 51, 54, 59, (61,62), 63, 70, 72, 75	(6, 7), 8, 22, 30, (41,42), 44, 66	(13), 28, 33	(12), 28, 33	4, (15), 16, 20, 65, (73,74), (77,78)	4, (14), 16, 20, 65, (73,74), (77,78)	4, (14,15), 20, 65, (73,74), (77,78)	(49,50), 64	2, (19), 29, 35
isolate19	isolate20	isolate21	isolate22	isolate23	isolate24	isolate25	isolate26	isolate27
2, (18), 29, 35	4, (14,15), 16, 20, 65, (73,74), (77,78)	1, 3, 5, 9, 10, 27, 31, 36, 38, 39, 47, 51, 54, 59, (61,62), 63, 70, 72, 75	(6,7), 8, 11, 30, (41,42), 44, 66	(24), (25,26), 43, (45,46), 53, 58, 60, (67,68), 69	(23,24), (25,26), 43, (45,46), 53, 58, 60, (67,68), 69	(23,24), (26), 43, (45,46), 53, 58, 60, (67,68), 69	(23,24), (25), 43, (45,46), 53, 58, 60, (67,68), 69	1, 3, 5, 9, 10, 21, 31, 36, 38, 39, 47, 51, 54, 59, (61,62), 63, 70, 72, 75
isolate28	isolate29	isolate30	isolate31	isolate32	isolate33	isolate34	isolate35	isolate36
(12,13), 33	2, (18,19), 35	(6,7), 8, 11, 22, (41,42), 44, 66	1, 3, 5, 9, 10, 21, 27, 36, 38, 39, 47, 51, 54, 59, (61,62), 63, 70, 72, 75	57, 71, 76	(12, 13), 28, 33	40, 48, 52, 56	2, (18,19), 29	1, 3, 5, 9, 10, 21, 27, 31, 38, 39, 47, 51, 54, 59, (61,62), 63, 70, 72, 75
isolate37	isolate38	isolate39	isolate40	isolate41	isolate42	isolate43	isolate44	isolate45
55	1, 3, 5, 9, 10, 21, 27, 31, 36, 39, 47, 51, 54, 59, (61,62), 63, 70, 72, 75	1, 3, 5, 9, 10, 21, 27, 31, 36, 38, 47, 51, 54, 59, (61,62), 63, 70, 72, 75	34, 48, 52, 56	(6,7), 8, 11, 22, 30, (42), 44, 66	(6,7), 8, 11, 22, 30, (41), 44, 66	(23,24), (25,26), (45,46), 53, 58, 60, (67,68), 69	(6,7), 8, 11, 22, 30, (41,42), 66	(23,24), (25,26), 43, (46), 53, 58, 60, (67,68), 69
isolate46	isolate47	isolate48	isolate49	isolate50	isolate51	isolate52	isolate53	isolate54
(23,24), (25,26), 43, (45), 53, 58, 60, (67,68), 69	1, 3, 5, 9, 10, 21, 27, 31, 36, 38, 39, 51, 54, 59, (61,62), 63, 70, 72, 75	34, 40, 52, 56	17, (50), 64	17, (49), 64	1, 3, 5, 9, 10, 21, 27, 31, 36, 38, 39, 47, 54, 59, (61,62), 63, 70, 72, 75	34, 40, 48, 56	(23, 24), (25,26), 43, (45,46), 58, 60, (67,68), 69	1, 3, 5, 9, 10, 21, 27, 31, 36, 38, 39, 47, 51, 59, (61,62), 63, 70, 72, 75
isolate55	isolate56	isolate57	isolate58	isolate59	isolate60	isolate61	isolate62	isolate63
37	34, 40, 48, 52	32, 71, 76	(23,24), (25,26), 43, (45,46), 53, 60, (67,68), 69	1, 3, 5, 9, 10, 21, 27, 31, 36, 38, 39, 47, 51, 54, (61,62), 63, 70, 72, 75	(23,24), (25,26), 43, (45,46), 53, 58, (67,68), 69	1, 3, 5, 9, 10, 21, 27, 31, 36, 38, 39, 47, 51, 54, 59, (62), 63, 70, 72, 75	1, 3, 5, 9, 10, 21, 27, 31, 36, 38, 39, 47, 51, 54, 59, (61), 63, 70, 72, 75	1, 3, 5, 9, 10, 21, 27, 31, 36, 38, 39, 47, 51, 54, 59, (61,62), 70, 72, 75
isolate64	isolate65	isolate66	isolate67	isolate68	isolate69	isolate70	isolate71	isolate72
17, (49,50)	4, (14,15), 16, 20, (73,74), (77,78)	(6,7), 8, 11, 22, 30, (41,42), 44	(23,24), (25,26), 43, (45,46), 53, 58, 60, (68), 69	(23,24), (25,26), 43, (45,46), 53, 58, 60, (67), 69	(23,24), (25,26), 43, (45,46), 53, 58, 60, (67,68)	1, 3, 5, 9, 10, 21, 27, 31, 36, 38, 39, 47, 51, 54, 59, (61,62), 63, 72, 75	32, 57, 76	1, 3, 5, 9, 10, 21, 27, 31, 36, 38, 39, 47, 51, 54, 59, (61,62), 63, 70, 75
isolate73	isolate74	isolate75	isolate76	isolate77	isolate78
4, (14,15), 16, 20, 65, (74), (77,78)	4, (14,15), 16, 20, 65, (73), (77,78)	1, 3, 5, 9, 10, 21, 27, 31, 36, 38, 39, 47, 51, 54, 59, (61,62), 63, 70, 72	32, 57, 71	4, (14,15), 16, 20, 65, (73,74), (78)	4, (14,15), 16, 20, 65, (73,74), (77)
Clusters Summary
Cluster 1	4, (14,15), 16, 20, 65, (73,74), (77,78)
Cluster 2	2, (18,19), 29, 35
Cluster 3	1, 3, 5, 9, 10, 21, 27, 31, 36, 38, 39, 47, 51, 54, 59, (61,62), 63, 70, 72, 75
Cluster 4	(6,7), 8, 11, 22, 30, (41,42), 44, 66
cluster 5	(12,13), 28, 33
cluster 6	17, (49,50), 64
cluster 7	(23,24), (25,26), 43, (45,46), 53, 58, 60, (67,68), 69
cluster 8	32, 57, 71, 76
cluster 9	34, 40, 48, 52, 56
cluster 10	37,55
